# Supplementary material for: Dielectric spectroscopy of ion-pairing and hydration in aqueous tetra-n-alkylammonium halide solutionsElectronic supplementary information (ESI) available: Relaxation parameters and relevant solution properties. See http://www.rsc.org/suppdata/cp/b1/b110361j/
Source: Royal Society of Chemistry journal article supplement (doi:10.1039/b110361j), 2002-04-29
Supplement: tables.pdf [file tables.pdf]

# Dielectric Relaxation of Aqueous Tetraalkylammonium Halide Solutions

## Supplementary material — Relaxation parameters and relevant solution properties

To allow a better assessment of the scatter of the dielectric relaxation parameters ( $\varepsilon_i$ ,  $\tau_i$ ) an additional figure beyond the significant number of decimal places is given for the parameters. The character ‘F’ following data indicates that this parameter was preset in the fitting procedure.

Table S1: Concentration,  $c$ , (in mol dm<sup>-3</sup>) density,  $\rho$ , (in kg dm<sup>-3</sup>) conductance,  $\kappa$ , (in  $\Omega^{-1}\text{m}^{-1}$ ) viscosity,  $\eta$ , (in 10<sup>-3</sup> Pa·s) dielectric relaxation parameters for dispersion steps  $i = 1 - 3$ ,  $\varepsilon_i$ ,  $\tau_i$ , (in 10<sup>-12</sup>s) and  $\varepsilon_\infty$ , of a sum of three Debye equations and corresponding variance of the fit,  $s^2$ , of aqueous Me<sub>4</sub>NBr, Et<sub>4</sub>NCl, and Et<sub>4</sub>NBr, solutions at 25 °C.

| $c$                 | $\rho$  | $\kappa$ | $\eta$ | $\varepsilon_1$ | $\tau_1$ | $\varepsilon_2$ | $\tau_2$ | $\varepsilon_3$ | $\tau_3$ | $\varepsilon_\infty$ | $s^2$ |
|---------------------|---------|----------|--------|-----------------|----------|-----------------|----------|-----------------|----------|----------------------|-------|
| Me <sub>4</sub> NBr |         |          |        |                 |          |                 |          |                 |          |                      |       |
| 0.1998              | 1.00485 | 1.8144   | 0.903  | 76.42           | 157      | 74.95           | 8.58     | 6.88            | 1.31     | 4.76                 | 0.063 |
| 0.3995              | 1.01271 | 3.2976   | 0.914  | 74.42           | 128      | 71.77           | 8.78     | 6.83            | 1.18     | 4.50                 | 0.073 |
| 0.5805              | 1.01982 | 4.4920   | 0.932  | 72.86           | 114      | 69.52           | 9.00     | 7.06            | 1.40     | 5.23                 | 0.098 |
| 0.7990              | 1.02835 | 5.8009   | 0.952  | 70.81           | 124      | 67.17           | 9.33     | 7.68            | 1.71     | 5.33                 | 0.058 |
| 0.9995              | 1.03626 | 6.8785   | 0.972  | 68.95           | 97.2     | 64.35           | 9.44     | 7.05            | 1.01     | 4.25                 | 0.071 |
| 1.2984              | 1.04792 | 8.2894   | 1.014  | 65.29           | 106      | 60.28           | 9.91     | 7.49            | 1.42     | 4.57                 | 0.061 |
| 1.7984              | 1.06780 | 10.180   | 1.100  | 59.59           | 81.3     | 54.09           | 10.5     | 7.58            | 1.68     | 5.38                 | 0.043 |
| 2.4000              | 1.09186 | 11.650   | 1.252  | 51.98           | 43.9     | 46.19           | 11.4     | 7.90            | 1.95     | 5.65                 | 0.027 |
| 2.9975              | 1.11622 | 12.257   | 1.478  | 44.77           | 42.3     | 38.64           | 12.0     | 7.24            | 1.06     | 4.52                 | 0.028 |
| Et <sub>4</sub> NCl |         |          |        |                 |          |                 |          |                 |          |                      |       |
| 0.0656              | 0.99690 | 0.5742   | 0.915  | 77.71           | 226      | 76.58           | 8.54     | 6.54            | 0.8      | 3.91                 | 0.108 |
| 0.1944              | 0.99688 | 1.503    | 0.965  | 74.32           | 131      | 73.67           | 8.88     | 6.53            | 0.6      | 1.93                 | 0.114 |
| 0.5177              | 0.99736 | 3.249    | 1.110  | 69.03           | 69.6     | 66.36           | 9.71     | 6.52            | 4.3      | 5.9                  | 0.132 |
| 0.979               | 0.99881 | 4.787    | 1.394  | 61.46           | 72.9     | 58.03           | 11.6     | 7.41            | 1.2      | 4.18                 | 0.097 |
| 1.694               | 1.00433 | 5.673    | 2.142  | 50.16           | 81.0     | 45.81           | 15.8     | 8.67            | 4.2      | 5.51                 | 0.069 |
| 2.230               | 1.00952 | 5.375    | 3.206  | 41.58           | 55.4     | 33.51           | 18.5     | 7.39            | 2.9      | 4.96                 | 0.052 |
| 2.765               | 1.01641 | 4.547    | 5.236  | 34.07           | 65.3     | 25.29           | 23.9     | 7.35            | 3.5      | 4.99                 | 0.038 |
| 3.2313              | 1.02278 | 3.558    | 8.800  | 28.76           | 76.0     | 16.40           | 25.0     | 6.85            | 2.8      | 4.72                 | 0.030 |
| 3.6134              | 1.02806 | 2.713    | 14.40  | 24.12           | 79.3     | 10.38           | 18.7     | 6.50            | 2.6      | 4.73                 | 0.021 |
| Et <sub>4</sub> NBr |         |          |        |                 |          |                 |          |                 |          |                      |       |
| 0.2136              | 1.00495 | 1.6036   | 0.964  | 75.49           | 94.2     | 73.05           | 8.84     | 6.62            | 2.1      | 5.46                 | 0.104 |
| 0.5752              | 1.01879 | 3.3587   | 1.120  | 68.84           | 78.6     | 65.68           | 9.91     | 6.82            | 1.2      | 4.52                 | 0.148 |
| 1.0559              | 1.03829 | 4.7347   | 1.399  | 61.24           | 59.5     | 56.95           | 12.2     | 10.2            | 4.6      | 5.59                 | 0.065 |
| 1.5139              | 1.05793 | 5.3440   | 1.804  | 53.31           | 35.6     | 44.91           | 13.1     | 7.21            | 1.7      | 4.87                 | 0.046 |

Table S2: Concentration,  $c$ , (in mol dm<sup>-3</sup>) density,  $\rho$ , (in kg dm<sup>-3</sup>) conductance,  $\kappa$ , (in  $\Omega^{-1}\text{m}^{-1}$ ) viscosity,  $\eta$ , (in 10<sup>-3</sup> Pa·s) dielectric relaxation parameters for dispersion steps  $i = 1 - 4$ ,  $\varepsilon_i$ ,  $\tau_i$ , (in 10<sup>-12</sup>s) and  $\varepsilon_\infty$ , of a sum of four Debye equations and corresponding variance of the fit,  $s^2$ , of aqueous Pr<sub>4</sub>NBr, Bu<sub>4</sub>NBr, and Pe<sub>4</sub>NBr, solutions at 25 °C.

| $c$                 | $\rho$  | $\kappa$ | $\eta$ | $\varepsilon_1$ | $\tau_1$ | $\varepsilon_2$ | $\tau_2$ | $\varepsilon_3$ | $\tau_3$ | $\varepsilon_4$ | $\tau_4$ | $\varepsilon_\infty$ | $s^2$ |
|---------------------|---------|----------|--------|-----------------|----------|-----------------|----------|-----------------|----------|-----------------|----------|----------------------|-------|
| Pr <sub>4</sub> NBr |         |          |        |                 |          |                 |          |                 |          |                 |          |                      |       |
| 0.2013              | 1.00269 | 1.2604   | 1.042  | 74.35           | 252      | 73.14           | 22.7     | 68.31           | 8.93     | 6.50            | 1.0F     | 4.50                 | 0.097 |
| 0.4043              | 1.00905 | 1.9980   | 1.239  | 70.32           | 225      | 68.32           | 22.0     | 58.18           | 9.39     | 6.40            | 1.0F     | 4.30                 | 0.040 |
| 0.6155              | 1.01615 | 2.4600   | 1.500  | 66.18           | 208      | 63.58           | 22.8     | 48.23           | 9.84     | 6.38            | 1.0F     | 4.28                 | 0.055 |
| 0.8215              | 1.02347 | 2.7122   | 1.823  | 61.14           | 192      | 58.05           | 21.0     | 38.76           | 10.7     | 6.61            | 1.0F     | 4.24                 | 0.043 |
| 1.0364              | 1.03162 | 2.8218   | 2.255  | 56.83           | 169      | 53.01           | 22.3     | 29.39           | 11.0     | 6.68            | 1.22     | 4.17                 | 0.026 |
| 1.2910              | 1.04150 | 2.8017   | 2.947  | 51.43           | 172      | 47.26           | 25.0     | 24.29           | 13.1     | 7.24            | 1.51     | 4.02                 | 0.014 |
| 1.5190              | 1.05068 | 2.6968   | 3.759  | 46.24           | 144      | 42.15           | 27.1     | 17.34           | 11.7     | 6.33            | 1.28     | 4.17                 | 0.020 |
| 2.1525              | 1.07517 | 2.1435   | 7.813  | 33.17           | 122      | 29.44           | 40.9     | 12.45           | 14.3     | 6.09            | 1.57     | 4.04                 | 0.008 |
| 2.5024              | 1.08738 | 1.7730   | 12.16  | 26.35           | 142      | 22.93           | 57.2     | 12.38           | 16.4     | 5.78            | 1.37     | 3.72                 | 0.008 |
| 3.0002              | 1.10079 | 1.1554   | 26.63  | 19.76           | 295      | 16.49           | 69.1     | 9.13            | 14.6     | 5.56            | 1.34     | 3.80                 | 0.006 |
| Bu <sub>4</sub> NBr |         |          |        |                 |          |                 |          |                 |          |                 |          |                      |       |
| 0.2133              | 1.00220 | 1.1762   | 1.165  | 72.22           | 119      | 70.64           | 15.2     | 60.88           | 9.16     | 6.91            | 1.0F     | 4.59                 | 0.027 |
| 0.5028              | 1.01042 | 1.8363   | 1.697  | 64.35           | 129      | 61.25           | 16.7     | 37.02           | 9.69     | 7.11            | 1.98     | 5.07                 | 0.018 |
| 0.7938              | 1.01916 | 2.0395   | 2.513  | 56.18           | 116      | 52.28           | 19.2     | 23.86           | 10.1     | 7.03            | 2.04     | 4.82                 | 0.031 |
| 0.9021              | 1.02209 | 2.0498   | 2.883  | 53.50           | 120      | 49.28           | 19.3     | 18.93           | 10.3     | 7.44            | 1.87     | 4.55                 | 0.020 |
| 1.2003              | 1.03052 | 1.9772   | 4.357  | 44.44           | 90.2     | 39.82           | 22.4     | 13.57           | 9.27     | 6.24            | 1.95     | 4.65                 | 0.014 |
| 1.6004              | 1.03964 | 1.7165   | 7.744  | 34.12           | 97.5     | 28.90           | 27.1     | 11.45           | 11.4     | 6.40            | 2.56     | 4.49                 | 0.008 |
| 2.0006              | 1.04648 | 1.3213   | 14.72  | 25.10           | 123      | 20.26           | 33.7     | 9.90            | 12.1     | 5.85            | 2.15     | 4.21                 | 0.007 |
| 2.3448              | 1.05085 | 0.8651   | 29.24  | 19.29           | 207      | 15.11           | 50.2     | 8.84            | 12.7     | 5.36            | 1.68     | 3.79                 | 0.004 |
| 2.6924              | 1.05452 | 0.3352   | 80.94  | 15.39           | 404      | 10.95           | 76.2     | 6.93            | 12.9     | 4.93            | 1.69     | 3.78                 | 0.002 |
| Pe <sub>4</sub> NBr |         |          |        |                 |          |                 |          |                 |          |                 |          |                      |       |
| 0.04998             | 0.99777 | 0.36731  | 0.959  | 76.72           | 408      | 76.40           | 18.2     | 73.93           | 8.58     | 6.14            | 1.0F     | 4.44                 | 0.106 |
| 0.10006             | 0.99861 | 0.64248  | 1.036  | 75.33           | 381      | 74.86           | 20.1     | 68.21           | 8.59     | 6.05            | 1.0F     | 4.24                 | 0.098 |
| 0.15008             | 0.99955 | 0.85972  | 1.123  | 73.48           | 324      | 72.61           | 19.3     | 65.35           | 8.98     | 6.23            | 1.0F     | 4.15                 | 0.107 |
| 0.20016             | 1.00049 | 1.03283  | 1.217  | 72.21           | 287      | 70.81           | 19.2     | 58.22           | 8.74     | 6.15            | 1.0F     | 3.89                 | 0.041 |

Table S3: Temperature,  $T$ , (in K) density,  $\rho$ , (in  $\text{kg dm}^{-3}$ ) conductance,  $\kappa$ , (in  $\Omega^{-1}\text{m}^{-1}$ ) viscosity,  $\eta$ , (in  $10^{-3}\text{Pa}\cdot\text{s}$ ) dielectric relaxation parameters for dispersion steps  $i = 1 - 4$ ,  $\varepsilon_i$ ,  $\tau_i$ , (in  $10^{-12}\text{s}$ ) and  $\varepsilon_\infty$ , of a sum of four Debye equations and corresponding variance of the fit,  $s^2$ , of aqueous  $\text{Pr}_4\text{NBr}$  at a molality of  $m = 1.8503\text{ mol kg}^{-1}$ , and  $\text{Bu}_4\text{NBr}$  at  $m = 1.2335\text{ mol kg}^{-1}$ .

| $T$                                                    | $\rho$  | $\kappa$ | $\eta$ | $\varepsilon_1$ | $\tau_1$ | $\varepsilon_2$ | $\tau_2$ | $\varepsilon_3$ | $\tau_3$ | $\varepsilon_4$ | $\tau_4$ | $\varepsilon_\infty$ | $s^2$ |
|--------------------------------------------------------|---------|----------|--------|-----------------|----------|-----------------|----------|-----------------|----------|-----------------|----------|----------------------|-------|
| $\text{Pr}_4\text{NBr}, m = 1.8503\text{ mol kg}^{-1}$ |         |          |        |                 |          |                 |          |                 |          |                 |          |                      |       |
| 273.15                                                 | 1.05270 | 0.9948   | 9.161  | 57.41           | 473      | 53.52           | 74.1     | 18.96           | 21.5     | 6.45            | 2.92     | 4.68                 | 0.027 |
| 278.15                                                 | 1.05074 | 1.2746   | 6.973  | 55.97           | 355      | 52.24           | 58.5     | 19.46           | 17.6     | 6.10            | 2.14     | 4.68                 | 0.021 |
| 283.15                                                 | 1.04868 | 1.5956   | 5.450  | 55.00           | 229      | 50.64           | 44.4     | 20.42           | 17.2     | 6.58            | 2.54     | 4.91                 | 0.031 |
| 288.15                                                 | 1.04638 | 1.9585   | 4.356  | 53.41           | 231      | 49.62           | 37.0     | 22.74           | 15.1     | 6.59            | 2.62     | 4.94                 | 0.016 |
| 293.15                                                 | 1.04403 | 2.3609   | 3.552  | 51.91           | 155      | 47.79           | 31.0     | 22.60           | 12.8     | 6.67            | 2.10     | 4.65                 | 0.036 |
| 298.15                                                 | 1.04150 | 2.8017   | 2.947  | 51.43           | 172      | 47.26           | 25.0     | 24.29           | 13.1     | 7.24            | 1.51     | 4.02                 | 0.014 |
| 303.15                                                 | 1.03877 | 3.2796   | 2.483  | 48.58           | 129      | 46.48           | 20.3     | 24.92           | 12.1     | 7.38            | 1.44     | 4.16                 | 0.022 |
| 308.15                                                 | 1.03605 | 3.7895   | 2.120  | 47.03           | 112      | 45.82           | 16.5     | 25.82           | 12.0     | 7.82            | 1.76     | 4.68                 | 0.028 |
| $\text{Bu}_4\text{NBr}, m = 1.2335\text{ mol kg}^{-1}$ |         |          |        |                 |          |                 |          |                 |          |                 |          |                      |       |
| 283.15                                                 | 1.02990 | 1.1557   | 5.464  | 57.65           | 143      | 52.04           | 38.0     | 21.56           | 16.1     | 6.88            | 3.19     | 5.02                 | 0.025 |
| 288.15                                                 | 1.02743 | 1.4279   | 4.308  | 55.58           | 150      | 51.09           | 30.2     | 21.17           | 13.6     | 6.68            | 2.40     | 4.82                 | 0.016 |
| 293.15                                                 | 1.02483 | 1.7255   | 3.482  | 54.65           | 152      | 51.24           | 24.4     | 20.25           | 11.5     | 7.13            | 2.15     | 4.69                 | 0.019 |
| 298.15                                                 | 1.02209 | 2.0498   | 2.883  | 53.50           | 120      | 49.28           | 19.3     | 18.93           | 10.3     | 7.44            | 1.87     | 4.55                 | 0.020 |
| 303.15                                                 | 1.01929 | 2.4025   | 2.413  | 51.87           | 114      | 48.44           | 15.5     | 17.14           | 9.70     | 7.84            | 2.07     | 4.71                 | 0.020 |
| 308.15                                                 | 1.01643 | 2.7835   | 2.057  | 50.25           | 125      | 47.83           | 13.7     | 16.16           | 8.01     | 7.55            | 1.54     | 4.38                 | 0.040 |
